# Supplementary material for: Global consumption-based deforestation carbon emissions and regional hotspots: 2001–2015
Source: Copernicus journal article supplement (doi:10.5194/essd-2024-619), 2025-02-24
Supplement: Supplementary file 1 [file essd-2024-619-supplement.pdf]

# Supplementary Information for Global consumption-based deforestation carbon emissions and regional hotspots: 2001–2015

Dongmei Tang<sup>1</sup>, Yuanzhi Yao<sup>1</sup>, Xia Li\*<sup>1</sup>

<sup>1</sup>School of Geographic Sciences, and Key Lab of Geographic Information Science (Ministry of Education), East China Normal University, Shanghai 200241, PR China

Correspondence to: Xia Li (lixia@geo.ecnu.edu.cn)

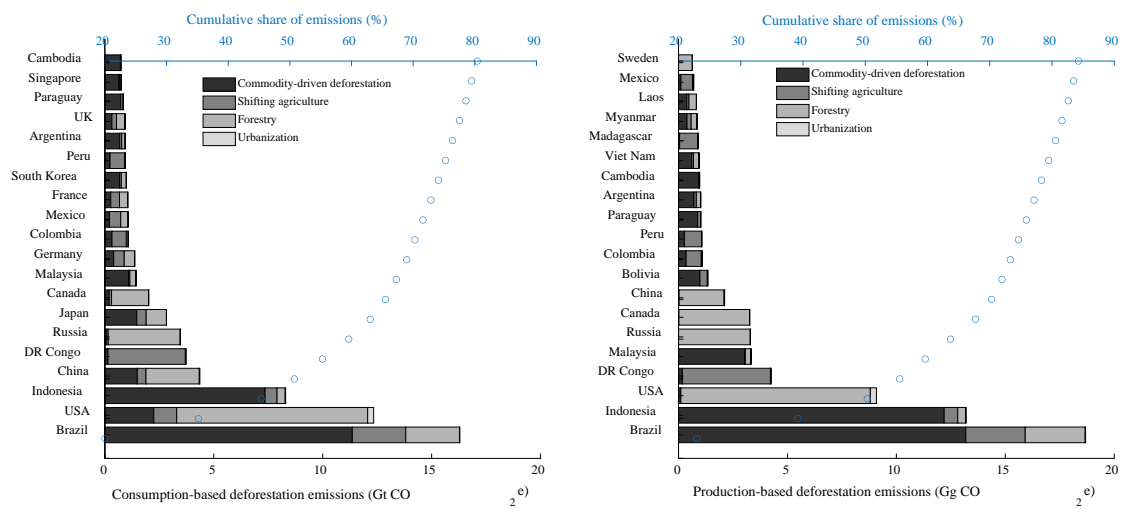

Figure S1 Consumption- and production-based deforestation emissions in top countries

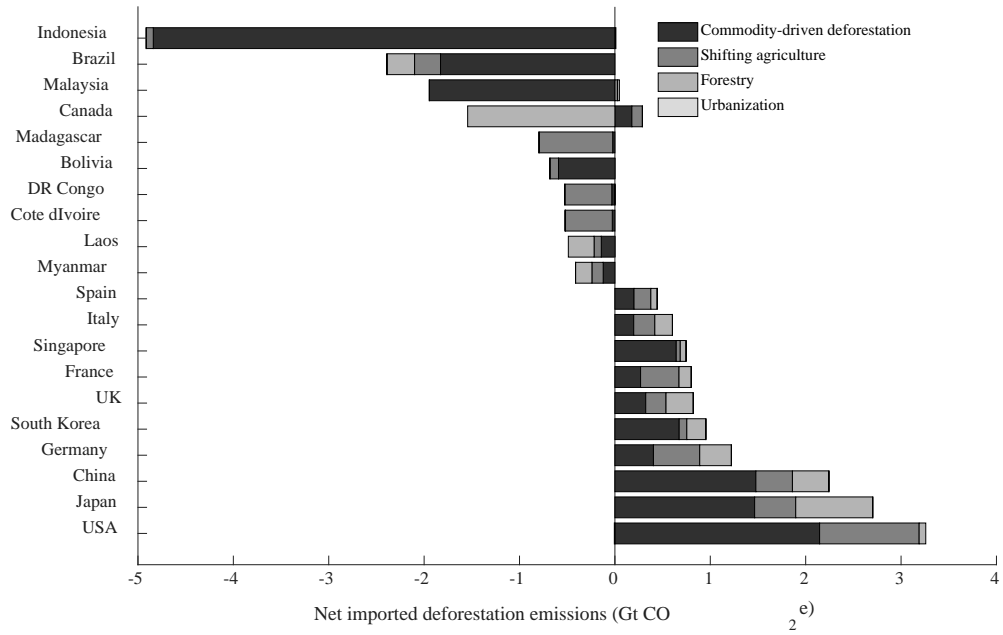

Figure S2 Top ten net imported and exported deforestation emissions countries

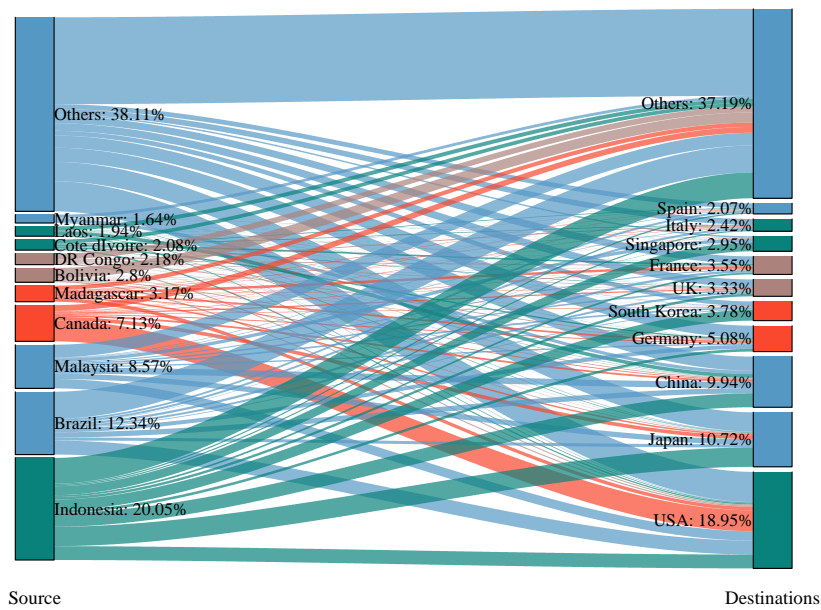

Figure S3 Flows of deforestation emissions between countries
